1 Genomic from *Plasmodium falciparum* field isolates from Benin allows the identification of PfEMP1  
2 variants by LC-MS/MS at the patient's level

3

4 Claire Kamaliddin<sup>a,b</sup>, David Rombaut<sup>b,c</sup>, Emilie Guillochon<sup>d</sup>, Jade Royo<sup>e</sup>, Sem Ezinmegnon<sup>a,f</sup>, Stéphanie  
5 Huguet<sup>g,h</sup>, Sayeh Guemouri<sup>a,b</sup>, Céline Peirera<sup>a</sup>, Cédric Broussard<sup>b,c</sup>, Jules M Alao<sup>i</sup>, Agnès Aubouy<sup>e</sup>,  
6 François Guillonau<sup>b,c</sup>, Philippe Deloron<sup>a,b</sup> and Gwladys Bertin<sup>a,b</sup>

7 <sup>a</sup>UMR 216 – MERIT, IRD, Paris Descartes University, Paris, France

8 <sup>b</sup>COMUE Sorbonne Paris Cité, Paris, France

9 <sup>c</sup>3p5 Proteomic Facility, Paris Descartes University, Paris, France

10 <sup>d</sup>Inovarion, Paris, France

11 <sup>e</sup>UMR 152 – PHARMADEV, IRD, Paul Sabatier Toulouse III University, Toulouse, France

12 <sup>f</sup>Centre pour la Recherche et l'Etude du paludisme associé à la grossesse et à l'enfance, Cotonou,  
13 Bénin

14 <sup>g</sup>Institute of Plant Sciences Paris-Saclay (IPS2), CNRS, INRA, Université Paris-Sud, Université  
15 d'Evry, Université Paris-Saclay, Gif sur Yvette, France

16 <sup>h</sup>Institute of Plant Sciences Paris-Saclay (IPS2), CNRS, INRA Université Paris-Diderot, Sorbonne  
17 Paris-Cité, Gif sur Yvette, France

18 <sup>i</sup>CHU-MEL, Pediatric department, Cotonou, Bénin

19

20 #Address correspondence to Gwladys I Bertin, gwladys.bertin@ird.fr

21 Abstract word count: 160 words

22 Text word count

23

24

25

## 26 **Abstract**

27 PfEMP1 are the major protein family from parasitic origin involves in the pathophysiology of severe  
28 malaria, and PfEMP1 domain subtypes are associated with the infection outcome. In addition, PfEMP1  
29 variability in endless and current protein repository do not reflect the immense diversity of the sequences of  
30 PfEMP1 proteins. The aim of our study was to identify the different PfEMP1 variants expressed within a  
31 patient sample by mass spectrometry. We performed a proteogenomic approach to decipher at the patient's  
32 level PfEMP1 expression in different clinical settings: cerebral malaria, severe anemia and uncomplicated  
33 malaria. The combination of whole genome sequencing approach, RNAsequencing, and mass spectrometry  
34 proteomic analysis allowed to attribute PfEMP1 sequences to each sample and classify the relative  
35 expression level of PfEMP1 proteins within each sample. We predicted PfEMP1 structures using the newly  
36 identified protein sequences. We confirmed the involvement of DBL $\beta$  in malaria pathogenesis and observed  
37 that CIDR $\alpha$  domains linked to ICAM-1 binding DBL $\beta$  domains displayed EPCR binding structure.

## 40 **Introduction**

41 *Plasmodium falciparum* is one of the causal agents of malaria in humans and leads to the severe form of the  
42 disease. In endemic areas, children under 5 years old are victims of cerebral malaria (CM) and severe  
43 anemia (SA). Despite the introduction of intra venous artesunate therapy, severe malaria mortality remains  
44 significant - 0.5% of malaria outbreak according to World Health Organization (WHO) (1).

45 Through its development in human erythrocytes, *P. falciparum* grows inside the erythrocyte and the infected  
46 erythrocyte's (iE) surface changes in shape and rigidity. Parasite proteins exported at the host cell surface  
47 mediate infected erythrocyte's adhesion to the host's endothelium. This phenomenon, called cytoadhesion,  
48 is the main virulence factor of the parasite and contributes to the pathophysiology of severe malaria. The  
49 sequestration of infected erythrocytes in the capillaries leads to hypoxia, occlusion and endothelial  
50 activation. In CM pathophysiology, the sequestration of iE in the brain capillaries is believed to trigger coma  
51 and brain swelling (2).

52 Among the proteins exported at the erythrocyte's surface, three variant surface antigens (VSA) families have  
53 been described: the repetitive interspersed family (RIFIN) (3, 4), subtelomeric variable open reading frame  
54 (STEVOR) (5, 6) and *Plasmodium falciparum* Erythrocyte Membrane Protein 1 (PfEMP1) (7), which is the  
55 most described VSA family. They are encoded by the multigenic *var* gene family (8–10), consisting in ~ 60  
56 copies per parasite genome. The diversity among *var* sequences is almost endless (11, 12) thus participating  
57 to the infected erythrocyte ability to evade the immune system.

58 PfEMP1 proteins are high molecular weight transmembrane proteins (200-350 kDa), and are composed of  
59 an intra-erythrocytic segment, which is conserved, and a highly variable extracellular segment (13). The  
60 extra-erythrocytic segment is composed of 4 to 9 alternated Duffy Binding Like (DBL) or Cystein Inter  
61 Domain Rich (CIDR) domains. The nature and the arrangement of these domains determine the binding  
62 phenotype of the infected erythrocyte (13, 14).

63 Among the PfEMP1 receptor in human endothelium, the most common is the broadly expressed in human  
64 cells CD36, but it is not related to any specific form of malaria. In the context of severe malaria, two human  
65 host receptors for PfEMP1 binding have been identified: the InterCellular Adhesion Molecule-1 receptor  
66 (ICAM-1) (15) and the Endothelial Protein C Receptor (EPCR) (16), both expressed by brain endothelial  
67 cells (17), and co-localized with the sequestered iEs (15). Specific domains from PfEMP1 are known to

68 interact with ICAM-1, including the Domain Cassette 4 (DC4) (DBL $\alpha$ 1.4/1.1-CIDR $\alpha$ 1.6-DBL $\beta$ 3) (18). The  
69 binding domain is located in the C-terminal third of the DBL $\beta$ 3 (18). A study conducted on lab-adapted  
70 patient's isolates after selecting on ICAM-1 highlighted that the residues involved in PfEMP1 binding to  
71 ICAM-1 are highly variable with a limited binding pattern (19) (20).

72 EPCR role in PfEMP1 binding has been more recently discovered (16). EPCR binding is mediated by highly  
73 variable but structurally conserved CIDR $\alpha$ 1 PfEMP1 domains (more precisely CIDR $\alpha$ 1.1 and CIDR $\alpha$ 1.4-  
74 1.8) (21, 22). Importantly, the level of PfEMP1 transcript associated with EPCR binding is higher in samples  
75 from patients suffering from severe malaria, and increases with the disease severity (21).

76 A dual-binding with EPCR and ICAM-1 has been suggested, since not all CM isolates present an increase in  
77 binding-EPCR PfEMP1 coding transcript (23). In addition, expression levels of *var* coding transcripts are  
78 increased in parasites able to bind to EPCR, ICAM-1 and CD36 *in vitro* enforcing the idea of a mutual  
79 binding (24). The expression of DBL involved in ICAM-1 binding is associated with dual ICAM-1 and  
80 EPCR binding (20).

81 Despite their high diversity, PfEMP1 proteins are a target of naturally acquired immunity against *P.*  
82 *falciparum* (25), and the parasite express VSA corresponding to gap in the antibodies repertoire from an  
83 individual (26, 27). Therefore, identification and characterization of severe malaria associated PfEMP1  
84 proteins is crucial. It is believed that despite the endless variability of PfEMP1 proteins (28), a cross-  
85 reactivity between expressed epitopes exists (29), as children in endemic area acquire protective immunity  
86 to the high binding phenotypes after a limited number of infection compared to PfEMP1 variability (26).  
87 PfEMP1 proteins are a proposed target for vaccine to protect people against severe forms of malaria (25,  
88 30).

89 Most field studies looking for *P. falciparum* binding phenotypes are based on molecular biology analysis,  
90 and have shown that transcript coding for specific PfEMP1 domains expression level are associated with  
91 disease outcome (21, 24, 31, 32). However, this strategy is currently limited to the already identified  
92 PfEMP1 domains and does not give proficiency of the expressed proteins.

93 To complement this deficiency, mass-spectrometry-based proteomics is a powerful and sensitive tool for  
94 bottom-up protein identification after trypsin digestion. The application of mass spectrometry for VSA  
95 identification, and more especially PfEMP1 identification remains challenging for the following reasons.

96 First, PfEMP1 are transmembrane proteins, and therefore present hydrophobic segments which decrease its  
97 solubility and its accessibility to proteases such as trypsin. Second, PfEMP1 are high molecular weight  
98 proteins (250-350 kDa), and finally, PfEMP1 are highly variable in sequences, yet database repository is  
99 usually simplified by eliminating redundancy. Thus, they do not reflect the natural sequence diversity which  
100 may occur in such a context.

101 To date, PfEMP1 identification with mass-spectrometry remains limited. In fact, the identification of the  
102 semi-conserved variant VAR2CSA in the context of Pregnancy Associated Malaria has been performed  
103 (33), but the identification of PfEMP1 variant in a context of severe malaria (CM or SA) has not been  
104 reported yet. The association of PfEMP1 domains with clinical outcome (UM, CM and Pregnancy  
105 Associated Malaria) was performed, with relaxed analysis parameters to allow the identification of PfEMP1  
106 domains (34).

107 To identify PfEMP1 associated with *P. falciparum* clinical outcome in endemic settings, we used a  
108 “proteogenomic” strategy on field sample from children from Benin, West Africa, retrieved from May 2016  
109 to August 2016. Specific PfEMP1 sequences from each isolate were reconstructed, using whole genome  
110 sequencing (WGS) data to enrich the protein database (Figure 1). We analyzed the whole proteome of  
111 samples from patients presenting either CM, SA or UM, and attribute PfEMP1 sequences within these  
112 samples. Corresponding samples were analyzed in RNAsequencing for PfEMP1 expression analysis, in  
113 relation to proteomic results.

114 We managed to identify the PfEMP1 sequence associated with 4 CM samples, 9 SA and 9 UM samples  
115 using mass spectrometry (MS). For two samples, the relative expression levels from the PfEMP1 identified  
116 in MS was assessed using RT-qPCR using the corresponding mRNA. We confirmed the expression of  
117 several PfEMP1 within a single field isolates and provided the first identification at the patient’s level of  
118 PfEMP1 expressed by the parasite in the context of acute *P. falciparum* infection. We were also able to  
119 predict PfEMP1 structure within each newly identified sequence.

## 122 **Results**

### 123 **Included Samples**

124 We included 95 patients, covering 31 SA, 18 CM and 46 UM. Average patient's age was similar among all  
125 inclusion groups. Parasite density geometric mean was 8,055 p/μL for UM group, 34,191 p/μL for CM and  
126 24,313 p/μL for SA. Parasite density was only significantly different between SA and UM samples ( $p =$   
127 0.0158 with Bonferroni's Multiple Comparison Test). Hemoglobin level was measured for 20 UM, 17 CM  
128 and 31 SA, respectively 11.28 [10.26; 12.75], 5.51 [4.10; 6.56] and 4.393 [3.90; 5.00] g/dL. Hemoglobin  
129 level was statistically different for UM samples (*vs.* CM and *vs.* SA) ( $p < 0.05$ ), but no difference was  
130 observed between SA and CM samples. No difference in erythrocyte count ( $p = 0.1274$ ) and temperature ( $p$   
131  $= 0.9125$ ) was retrieved between SA and CM. All CM patients presented a coma (average BS 2 [2;2]), while  
132 SA patients did not (average BS 4.6 [4;5]) ( $p < 0.0001$ ). 14/18 CM patients presented convulsions, and 7/38  
133 SA patients ( $p < 0.0001$ ).

134 For mass spectrometry analysis, we selected samples among those showing successful maturation. Four CM,  
135 9 SA and 9 UM samples have been further investigated. RNAsequencing was successfully performed on 10  
136 samples corresponding to the one studied in mass spectrometry (1 UM, 5 SA (3 patients) and 4 CM (2  
137 patients)). (Supplementary Table 1)

### 138 ***Var* genes transcripts identification with RNAsequencing**

139 We then focused on a set of 120 proteins from PlasmoDB reference, corresponding either to PfEMP1, or to  
140 other proteins associated with knobs formation (Supplementary data Table 3). The presence of skeleton  
141 binding protein 1 (Pf3D7\_0501300) and EMP1 (Pf3D7\_0730900) was assessed in all samples except SA09.  
142 Focusing on PfEMP1, we observed that the conserved ATS coding region was the only site for PfEMP1  
143 mRNA identification using reference sequences from PlasmoDB. We then performed a selective mapping of  
144 RNAsequencing reads using the sequences from *var* genes reconstruction, which allowed to identify the  
145 expressed *var* transcript for 3 samples (Supplementary Table 4).

### 146 **Protein identification**

147 Protein identification was performed using a home-made database (reference sequences from human and *P.*  
148 *falciparum* repositories, and the assembled *var* from field samples) containing 295,601 protein sequences,

149 among which 87,489 were *P. falciparum*-associated sequences, while the other referred to the human  
150 proteome. Overall, we identified 3,300 proteins. After applying contaminant depletion and identification  
151 criteria, 3 214 proteins remained. A total of 1,302 were associated to the human proteome, and 1,912 to *P.*  
152 *falciparum*'s. Among those later, 460 proteins were identified as *P. falciparum* membrane-associated  
153 proteins, including 60.4% of hypothetical or putative, 12 % of PfEMP1s, 3.5% of RIFINs, 0.9% of  
154 STEVORs, 1.5% of PHISTs and 21.7% belong to other protein families.

155 A total of 155 proteins associated with PfEMP1 were identified, among which 96 were unique proteins, and  
156 clustered in 55 protein groups. Only 10 of the identified PfEMP1 (as part of protein group, or majority  
157 protein) were known sequences from public database repository (Uniprot and PlasmoDB). All other  
158 identified PfEMP1 sequences resulted from the translation of the reconstructed *var* genes from our samples.

### 159 **PfEMP1 identification and composition**

160 We then focused on the 55 protein groups associated to PfEMP1 proteins. The minimum peptide number for  
161 protein identification was 2. Sequence coverage ranged from 0.6 to 24.6 % maximum. Average molecular  
162 weight of the identified PfEMP1 was 228.3 kDa. Using the VarDom online server, we reconstructed the  
163 domain architecture from the identified proteins (Figure 2). Fifty-three sequences displayed at least one hit  
164 with the repository sequences. NTS domain was found in 73.6 % of the sequences (39/53 sequences  
165 presenting at least one hit with VarDom reference sequences) and 97 % (38/39) of the sequences presenting  
166 NTS displayed the following combination: NTS-DBL $\alpha$ -CIDR $\alpha$ . The three-major head-terminal domain  
167 organizations were the following: NTS-DBL $\alpha$ -CIDR $\alpha$ -DBL $\beta$  (58.9%; n = 23/39), NTS-DBL $\alpha$ -CIDR $\alpha$ -  
168 DBL $\delta$  (30.8%; n = 12/39) and NTS-DBL $\alpha$ -CIDR $\alpha$ -DBL $\gamma$  (2.6%; n = 1/39). To attribute more precisely  
169 subdomains to the identified PfEMP1 proteins, we performed a local blast from the 110 peptides associated  
170 to the PfEMP1 proteins against the VarDom sequences repository (Figure 3 and Figure 4). Fifty four percent  
171 (n = 60/110) of the peptides displayed at least one hit with the reference sequences from VarDom (median  
172 hit number per peptide was 5 (interquartile range [2; 23])), among which 40/110 peptides displayed hits with  
173 more than 90% identity with a reference sequence (among these, median number of hits per peptide was 2  
174 (interquartile range [1; 5])). Most of the obtained hits from peptides with reference sequences corresponded  
175 to ATS sequences (171 hits), and 71 hits covering DBL domains (among them, 25 for DBL $\alpha$ , 20 for DBL $\beta$ ,  
176 14 for DBL $\delta$ , 1 for DBL $\epsilon$  and 11 for DBL $\gamma$ ). One hit corresponded to NTS domain. Subdomain attribution

177 was performed successfully for the corresponding peptides. No peptide was issued from CIDR $\alpha$  and seven  
178 peptides were issued from DBL $\beta$ .

179 The specific search of the binding pattern for ICAM-1 retrieved 6 identifications within the PfEMP1  
180 sequences identified in mass spectrometry.

### 181 **PfEMP1 associated with clinical outcome of infection**

182 Among the identified PfEMP1 proteins in LC-MS/MS, 11 were shared between all patient's group, 2 were  
183 specifically associated with CM, 5 with UM and 18 with SA. SA and CM shared 8 proteins, UM and CM 14  
184 proteins, and SA and UM 6 proteins (Figure 5). The corresponding PfEMP1 are listed in Table 1.

185 The PfEMP1 containing ICAM-1 binding pattern were associated to several protein groups, and matching  
186 with 5/9 of SA samples, 3/4 CM, and 4/9 UM samples (Figure 3). However, no peptide was identified  
187 corresponding directly to the pattern. We performed a 3D structure prediction (using 3D7 template available  
188 in PDB) from all DLB $\beta$  identified within the sequences obtained from WGS and identified in LC-MS/MS.  
189 Average quality score was 0.554 ( $\pm$  0.047). RMSD calculation showed that the obtained DBL $\beta$  structure are  
190 highly similar (Figure 6 A).

191 Focusing on CIDR $\alpha$ , we were able to produce acceptable (quality score 0.470  $\pm$  0.092) folding for all  
192 sequences except two which were excluded from the clustering. As expected, we observed that CIDR $\alpha$ 1-  
193 like sequences and CIDR $\alpha$  "non  $\alpha$ 1" were clustered respectively (Figure 6 B). Using PyMol visualization of  
194 predicted 3D structure, we focused on the two  $\alpha$  helix involved respectively in CD36 binding and interaction  
195 with EPCR (35). Among the CIDR $\alpha$  sequences, 14 presented a CIDR $\alpha$  "non  $\alpha$ 1" helix fold, among which 12  
196 were folded correctly.

197 We then predicted the structure from CIDR $\alpha$  linked to DBL $\beta$  presenting ICAM-1 binding predicted pattern –  
198 6 PfEMP1 proteins containing DBL $\beta$ -ICAM-1 binding pattern (Figure 6C). These CIDR $\alpha$  presented a  
199 phenylalanine (5/6 sequences) or tyrosine (1/6 sequences) in position 187 (1/6 sequences), 188 (3/6  
200 sequences), 184 (1/6 sequences), 190 (1/6 sequences) from the corresponding CIDR $\alpha$  (Figure 6B). These  
201 amino acids were juxtaposed and exposed similarly to the phenylalanine involved in EPCR binding from  
202 Hb3var3 CIDR $\alpha$  3D structure.



## Genomic and transcript data for specific protein identification

Since we had access to preserved RNA for 2 samples in addition to RNAsequencing data (CM04 and SA06 at 3 additional sampling time each: H0 (diagnosis of malaria) and post diagnosis sample, H16, H24 for CM04 and H0, H8, H16, for SA06), we selectively designed primers that would specifically amplify the PfEMP1 transcripts from the mass spectrometry matching sequences (Figure 1). Our goal was to assess which ones of these proteins are expressed, and their corresponding relative expression level using the Tu measurement method. Using alignment tools, we managed to find discriminant primers between the 6 identified sequences for sample SA06 (g45, g949, g1030, g1025, g150 and g62) and the 3 sequences (g276, g299 and g522) for sample CM04. Identified primers are presented in Supplementary data table 1 and quantification on Figure 7 for sample SA06. The amplification profile of reference genes was not satisfying for CM04-H0 and SA06-H08 samples, which were excluded from the analysis. For patient CM04, at H16, transcript expression was at the detection level threshold and no major transcript was identified. For patient CM04, at H24, the major transcript is g276 followed by g299 and g522 (Tu respectively: 43.26 – 4.24 – 1.32). For sequences that displayed different Melting Temperature (Tm), selective sequencing did not reveal differences between sequences, except for CM04 g276 sequence amplified with the designed primers.

## 219 **Discussion**

220 The evolution of *P. falciparum* infection from uncomplicated forms of the disease to cerebral malaria, the  
221 most fatal, is a complex phenomenon which entails host and parasite factors, in addition to socio-economics  
222 settings (36). There are strong evidence that the PfEMP1 proteins are involved in the disease progression  
223 since they allow the parasite to bind to host endothelium (14). It is believed that a distinct subset of PfEMP1  
224 proteins is involved in severe malaria (23, 37), most likely by providing to the parasite the ability to  
225 sequester to a given receptor. However, PfEMP1 identification in natural infection remained challenging,  
226 due to the large size of PfEMP1 and their high sequences diversity. Recently, Jespersen et al (23) provided a  
227 new insight towards *var* genes sequences expression analysis in patient's sample using transcript  
228 reconstruction after DBL $\alpha$  barcoding. They confirmed the preferential expression of CIDR $\alpha$  associated with  
229 EPCR binding in severe malaria patients.

230 We used a mass spectrometry-based proteomic approach to analyse the *P. falciparum* proteome in the  
231 context of severe malaria (SA and CM) compared to UM. We aimed to accurately identify, at the protein  
232 level, the PfEMP1 sequence variants associated with diseases severity. To this end, we initiated a  
233 "proteogenomic" study of field samples. In collaboration with the WT Sanger institute, we performed whole  
234 genome sequencing of the samples and had access to the assembled *var* gene sequences of the samples.  
235 Second, we performed RNAsequencing of these samples and analysed by LC-MS/MS the corresponding  
236 matured parasites. RNAsequencing reads were aligned for *P. falciparum* transcripts expression both on  
237 reference transcriptome and sequences issued from WGS of our samples. Reference database allowed the  
238 identification of *var* transcripts; however, all mapped reads were in semi conserved ATS coding region.  
239 Protein identification was performed by matching mass-spectrometry data against a custom database  
240 containing the translated PfEMP1 sequences (Figure 1). As anticipated, most of the identified PfEMP1  
241 (considering all PfEMP1 from all protein group) came from the newly added sequences to the database  
242 (10/96 were known sequences), confirming the validity of our approach.

243 The technical improvement allowed us to identify more proteins than previously published studies (34, 38),  
244 with higher sequence coverage. We identified a set of 55 PfEMP1 associated in protein group. We  
245 investigated the structure of theses sequences and found that the two main domain organisations were NTS-  
246 DBL $\alpha$ -CIDR $\alpha$ -DBL $\beta$  and NTS-DBL $\alpha$ -CIDR $\alpha$ -DBL $\delta$ . The high proportion of NTS-DBL $\alpha$ -CIDR $\alpha$ -DBL $\beta$

247 among expressed PfEMP1 identified in our samples compared to genomic sequences within the same  
248 sample pool reflects the preferential expression of the PfEMP1 containing this pattern compared with the  
249 other PfEMP1 protein sequences in the studied context. The CIDR $\alpha$ -DBL $\beta$  tandem is associated with the  
250 potential “double binding” PfEMP1 (20, 24), targeting both ICAM-1 (through DBL $\beta$  (20)) and EPCR  
251 (through CIDR $\alpha$  (22)) human endothelial receptor. PfEMP1 binding pattern to ICAM-1 was not identified  
252 with specific peptides; however, proteins containing the binding pattern were identified in our samples (all  
253 malaria clinical presentation). We were able to predict domains structure for the CIDR $\alpha$  from PfEMP1  
254 identified within our sequences pool. The proportion of “non  $\alpha$ 1” CIDR sequences identified is lower than  
255 the corresponding sequences in parasite genomes, ( CIDR $\alpha$ 2-6 represent 85% of PfEMP1 in parasite  
256 genomes) (37), enforcing the idea of preferential expression from PfEMP1 encoding EPCR binding CIDR $\alpha$   
257 within malaria clinical presentation. In addition, all sequences presenting CIDR $\alpha$ -DBL $\beta$ - [ICAM-1 binder]  
258 harboured EPCR binding like CIDR $\alpha$ , enforced by 3D representation of domain structure.

259 For two isolates (SA09 and CM04), the identified PfEMP1 proteins were directly and unambiguously  
260 associated to transcript from the same isolate. To ensure whether several PfEMP1 proteins were expressed in  
261 the sample or if this was due to the identification method (peptides mapping sequences), we performed  
262 selective sequencing of the corresponding mRNA within the same sample. We managed to identify the most  
263 expressed transcript for one (CM04-H24), and the two main expressed transcripts for the other (SA09-H16).  
264 However, transcript corresponding to the other identified proteins existed at low expression level. It seems  
265 legitimate that along multiplication cycles, parasites express different PfEMP1. Furthermore, natural  
266 infection are often polyclonal and patients in endemic areas harbour usually 2 to 3 clones (39). However, we  
267 identified more sequences per sample than clones, strengthening the idea of simultaneous expression of  
268 several sets of PfEMP1 proteins by the parasite population within an individual. In addition, there are less  
269 PfEMP1 proteins identified in mass spectrometry compared to RNA sequencing/RT-qPCR approach. It  
270 seems plausible that, for technical reasons, PfEMP1 identification in LC-MS/MS provides a subset of the  
271 major proteins associated with each sample. In addition, all mRNA might not occur translation, as  
272 pseudogenes from *var* family are described. mRNA analysis reflects both coding and non-coding RNA  
273 expressed by a sample.

274 Focusing on patient's group (CM, SA and UM), no consensus or highly similar sequence was obtained for a  
275 given clinical outcome of *P. falciparum* infection. Most sequences were shared between patient groups,  
276 since their identification relies mostly on reads mapping in the semi-conserved region ATS. We could not  
277 specifically identify sequences coding for the ICAM-1 binding pattern or the CIDR $\alpha$  involved in EPCR  
278 binding within severe malaria group. However, for sample SA06, one of the major proteins and transcript  
279 identified corresponds to a sequence expressing the binding pattern for ICAM-1.

280 We were not able to attribute domains subtype to the obtained sequences. The high diversity of PfEMP1  
281 protein sequences compared with the repository database prevented us from assigning a subdomain to every  
282 domain. This limitation did not allow us to specifically identify subtypes of domains, in relation to reference  
283 sequences, associated with *P. falciparum* infection severity. However, selective alignment from obtained  
284 peptides to reference sequences repository allowed to identify domain subtypes for 36% (40/110) of  
285 identified peptides. This difficulty to attribute a domain may be the consequence of either: the peptide being  
286 shared between two or more domains, or the peptide has never been previously identified thus absent from  
287 the database (Figure 2). Variant protein identification in mass spectrometry is challenging, since protein  
288 identification is the reflection of the quality of the database available. Restrictive use of reference sequences  
289 from public repositories reduces the "chance" of protein identification, but we ride out this challenge with  
290 our home-custom sequence database obtained through whole genome sequencing of our samples. The  
291 variability of PfEMP1 primary sequence was overcome using protein structure modelling, which allowed us  
292 to classify the CIDR $\alpha$  identified within predicted binding target. We confirmed that PfEMP1 protein  
293 sequences which display ICAM-1 binding pattern present CIDR $\alpha$  domains with EPCR binding folding.

294 This study highlights the perspective offered by proteogenomic approaches for VSA studies. Using a home-  
295 made database containing PfEMP1 sequences obtained from WGS of the corresponding samples, we  
296 managed to identify specific PfEMP1 pattern associated with each sample, where RNAsequencing alone  
297 could not discriminate the expressed PfEMP1 within a sample. However, the sequence coverage of the  
298 identified proteins remained limited. Further attempts should focus on increasing the number of identified  
299 peptides per protein, using for example selective enrichment in membrane proteins. The identification of  
300 new PfEMP1 variants using whole genome sequencing and the confirmation of their expression at the  
301 protein level is, to our knowledge, the first report using field isolates.

302 In conclusion, we identified PfEMP1 proteins expressed by parasite in patients presenting several forms of  
303 malaria. This is the first report of PfEMP1 direct identification and is providing insight towards malaria  
304 pathogenesis understanding. PfEMP1 are adhesin which mediates iE adhesion to the host endothelium. The  
305 high proportion of CIDR $\alpha$  among the identified sequences enforce the idea that iE sequestration occurs  
306 either through CD36 binding, or EPCR binding, pending of clinical presentation (22, 40). We also  
307 preferentially identified PfEMP1 protein harbouring DBL $\beta$ , among which 20% (6/30 identified DBL $\beta$ )  
308 displayed the binding pattern for ICAM-1. This strengthen the hypothesis that DBL $\beta$  is involved in the  
309 disease development, as demonstrated with antibodies against DBL $\beta$  in Tanzania (41) and Papua New  
310 Guinea (42). Antibodies against full length DBL $\beta$ <sub>PF11\_0521</sub> are associated with reduction risk of severe  
311 malaria and protection against clinical infection (42). We demonstrated that predicted 3D structure from all  
312 DBL $\beta$  identified in the studied followed closely DBL $\beta$ <sub>PF11\_0521</sub> structure, enforcing the idea of  
313 DBL $\beta$ <sub>PF11\_0521</sub> as a vaccination target to prevent severe malaria. Further studies to identify immune  
314 response to DBL $\beta$ <sub>PF11\_0521</sub>, in combination with different CIDR $\alpha$  subtype are needed. There is little doubt  
315 that upcoming strategies to prevent severe malaria will target DBL $\beta$ <sub>PF11\_0521</sub> in combination with EPCR  
316 binder CIDR $\alpha$  in a multi epitope vaccination strategy.

317 Our study opens opportunities to identify PfEMP1 variants and later implement these newly identified  
318 sequences in PfEMP1 based vaccine development strategies. However, our approach was restricted to one  
319 geographic area (Benin, West Africa) and included a limited number of patients. Further studies should  
320 include patients from various *P. falciparum* endemic areas to better represent PfEMP1 associated within *P.*  
321 *falciparum* disease in general and specifically to severe malaria.

## **Material and Methods**

### **Ethic statement**

Ethical clearance was obtained from the Institutional Ethics Committee of the faculty of health science at the Abomey-Calavi University in Benin (clearance n°90, 06/06/2016). Before inclusion, written informed consent was obtained from children' guardians. Patients were treated in accordance to the national malaria program policy. The methods were carried out in accordance with the relevant guidelines and regulations.

### **Sample collection**

Patients under age 5, presenting severe malaria were included in the Lagune Mother and Child Hospital in Cotonou, Benin. Two distinct clinical groups were constituted, as following. CM was defined as a *Plasmodium falciparum* infection associated with a coma (Blantyre score  $\leq 2$ ) and the absence of meningitis detected by CSF count and culture. SA was defined as a *P. falciparum* infection associated with Hb  $< 5\text{g/dL}$ , measured using Hemocue® device (Radiometer). UM patients were included in Saint-Joseph Hospital, in Sô-Ava, Benin (16 km from Cotonou). UM was defined as a *P. falciparum* infection with fever, in the absence of any other complication. The study was conducted at the rainy season (May – August) 2016. Five mL of peripheral whole blood were collected on EDTA, (with additional sampling at 8h, 16h and 24h post treatment initiation for CM and SA patients). Parasite density was evaluated with Giemsa-stained thick blood smear. Only pure *P. falciparum* infection were retained for the study. Samples were depleted from white blood cells using a gradient based separation technique Ficoll (GE Healthcare Life Science).

### **Whole genome sequencing**

Fifty  $\mu\text{L}$  of erythrocyte's pellet was extracted using DNEasy Blood kit (Qiagen). WGS was performed by the Malaria Genomic Epidemiology Network (MalariaGEN) at the Wellcome Trust Sanger Institute (Hinxton, UK).

### **Transcriptome studies**

Ring staged parasite were preserved in 5 volumes of pre-warmed (37°C) TriZol (Life Technology), vortexed then immediately frozen at -80°C until further utilization. RNA was extracted as described (43), then digested with DNase I (Qiagen) and purified using RNEasy MinElute Cleanup kit column (Qiagen). Absence of genomic DNA was assessed by the absence of amplification of p90 gene in qPCR from the

350 direct use of the RNA extract, using Syber Green reagent (Life Technology) on Rotorgene 6000 (Corbett  
351 Technology). RNA quality was assessed using PicoChip Agilent 2100TM Bioanalyzer profile (Agilent).  
352 Only RNA presenting a RNA Integrity Number (RIN) > 7 were retained for downstream analysis (44).  
353 Sequencing technology used was an Illumina NexSeq500 (IPS2 POPS platform). RNA-seq libraries were  
354 performed by TruSeq Stranded mRNA protocol (Illumina®, California, U.S.A.). The RNA-seq samples  
355 have been sequenced in paired-end (PE) with a sizing of 260 base pairs and a read length of 150 bases. 54  
356 samples by lane of NextSeq500 using individual bar-coded adapters and giving approximately 5 million of  
357 PE reads by sample are generated.

### 358 **RNA-sequencing data bioinformatics treatment and analysis**

359 RNA-Seq preprocessing includes trimming library adapters and performing quality controls. The raw data  
360 (fastq) were trimmed with Trimmomatic (45) tool for Phred Quality Score Qscore >20, read length >30  
361 bases, and ribosome sequences were removed with tool sortMeRNA (46). Reads were mapped against the  
362 *Plasmodium falciparum* 3D7 reference genome (PlasmoDB v35) and against the reconstructed sequences  
363 from WGS, using STAR (version 2.5.4b) with default parameters. A sequence was considered as  
364 successfully sequenced if more than 70% of the transcript was covered with at least 5 reads.

### 365 **Obtention of mature forms from *P. falciparum***

366 Blood samples were matured *in vitro* for 18 to 32 hours in RPMI medium supplemented with human serum  
367 and Albumax (Gibco) and preserved after MACS™ (Myltenyi Biotech) enrichment as described (33).

### 368 **Protein extraction and sample preparation for mass spectrometry analysis**

369 Whole cell infected erythrocyte lysates were solubilized and digested in solution using trypsin (Promega,  
370 sequencing Grade). Briefly, 50 µg of proteins from whole cell lysates were diluted to 25 µl in solubilization  
371 buffer (1% sodium desoxycholate, 100 mM Tris/HCl, pH8.5, 10mM TCEP, 40 mM chloroacetamide),  
372 heated for 5 min at 95°C and sonicated three times for 30 s. Once at room temperature, extracts were diluted  
373 with 25 µl Tris-ACN buffer (50mM Tris/HCl pH 8.5, 10% ACN). Collected peptides were fractionated in 5  
374 fractions per sample by strong cationic exchange (SCX) StageTips (47).

## 375 **Mass spectrometry analysis**

376 Mass Spectrometry (MS) analysis were performed on a Dionex U3000 RSLC nano-LC-system coupled to an  
377 Orbitrap-fusion mass spectrometer (Thermo Fisher Scientific) as described (48). Peptides were separated on  
378 a C18 reverse-phase resin (75- $\mu$ m inner diameter and 15-cm length) with a 3-hr gradient. The mass  
379 spectrometer acquired data throughout the elution process and operated in a data-dependent scheme.

## 380 **Accession number**

381 The raw reads were available under the accession number listed in supplemental data 5. VarDOM server for  
382 *var* genes is available at the following address [www.cbs.dtu.dk/services/VarDom/](http://www.cbs.dtu.dk/services/VarDom/). PlasmoDB reference  
383 sequences are available on EupathDB portal dedicated to *Plasmodium* (<http://plasmodb.org/plasmo/>).

## 384 **Database construction**

385 To get an accurate identification of proteins, a database was created as follows: Since our samples have been  
386 sequenced by the MalariaGen consortium (UK), whole genome sequences were available. Reconstructed *var*  
387 genes were kindly provided by Thomas Otto, Matt Berriman and Chris Newbold from the Wellcome Trust  
388 Sanger Institute. We concatenated *P. falciparum* proteins sequences from PlasmoDB (v35) Uniprot and  
389 NCBI. We added our own PfEMP1 sequences, obtained after *in silico* translation from *var* genes  
390 reconstruction. Duplicate sequences were removed. FASTA sequence headers were uniformed to facilitate  
391 MaxQuant sequences analysis.

## 392 **Raw data processing**

393 The mass spectrometry data were analyzed using Maxquant version 1.5.2.8 (49). The database used was our  
394 homemade database (see above section) and the list of contaminant sequences from Maxquant. The  
395 precursor mass tolerance was set to 4.5 ppm and the fragment mass tolerance to 0.5 Da.  
396 Carbamidomethylation of cysteins was set as constant modification and acetylation of protein N-terminus  
397 and oxidation of methionine were set as variable modifications. Second peptide search was allowed, and  
398 minimal length of peptides was set at 7 amino acids. False discovery rate (FDR) was kept below 1% on both  
399 peptides and proteins. Label-free protein quantification (LFQ) was done using both unique and razor  
400 peptides. At least 2 such peptides were required for LFQ. The “match between runs” (MBR) option was  
401 allowed with a match time window of 1 min and an alignment time window of 30 min.



402 For analysis, LFQ results from MaxQuant were imported into the Perseus software (version 1.5.1.6).  
403 Reverse and contaminant proteins were excluded. Only proteins from *P. falciparum* were selected for further  
404 analysis. We then focused on the membrane associated and putative proteins from *P. falciparum*.

### 405 **Protein sequence analysis and structure prediction**

406 PfEMP1 sequences were aligned using the VarDom server (available at  
407 <http://www.cbs.dtu.dk/services/VarDom/>) for domain type identification (11). We specifically searched the  
408 pattern for ICAM-1 binding I[V/L]<sub>x9</sub>N[E]GG[P/A]<sub>x</sub>Y<sub>x27</sub>GPP<sub>x3</sub>H (20) in the identified PfEMP1 sequences  
409 using the ProSite online interface (50).

410 Using domain limitation performed with VarDOM server, we predicted the structure of the CIDR $\alpha$  and  
411 DBL $\beta$  domains identified within our sequences. Structure were generated using Modeller (v9.20.) (51). We  
412 selected templates from the Protein Data Bank (52) using BLAST algorithm. Template selection was  
413 performed manually using BLAST results, sequence coverage within each template and template quality.  
414 DBL $\beta$  structure prediction was performed using PDB 5mza (PF11\_0521). For the CIDR $\alpha$  domain, the  
415 following templates were used: 4v3d (from HB3var03), 4v3e (from IT4var07), 3c64 (MC179) and 5lgd  
416 (from MCvar1). Template and query quality scores were calculated using ProQ3 online tool. For 5mza the  
417 quality score was 0.560. For 4v3d, 4v3e, 3c64 and 5lgd, quality scores were respectively 0.484, 0.585, 0.396  
418 and 0.540. For each domain, 5 models have been generated, and 4 additional models were generated after  
419 loop refining. Template and query mapping has been performed using align2D tool from Modeller script.  
420 For structure modelling using several templates, we used salign script (part of Modeller script).

421 The choice of the best model was made based on the Discrete Optimized Protein Energy (DOPE) score  
422 values. In order to analyze and compare the modeled structures were compared using the Bio3D v 3.2 R  
423 package (53). Structure comparison was based on Root-Mean-Square Deviation (RMSD) calculated using  
424 C $\alpha$  distance from predicted structures. Obtained RMSD values were clustered using Bio3D R package (53).

### 425 **Statistical analysis**

426 Patient's samples information's were compared between the 3 patient's groups (UM, CM and SA) using  
427 one-way ANOVA. Bonferroni's Multiple Comparison Test was applied for individual group comparison.

428 We considered a  $p$  value  $< 0.05$  as significant. Qualitative data were compared with Chi Squared test using  
429 contingency table. All analyses were performed using Prism v5 (Graphpad).

### 430 **Primer design**

431 We tried to specifically assign PfEMP1 expression within the samples. In addition to RNAsequencing data,  
432 we disposed of preserved RNA from 2 samples. Our strategy was as follows: first, we compared the  
433 sequences of the identified proteins using Multalin (54). Second, we designed specific primers targeting the  
434 sequences using Primer3Plus web interface (55). Finally, we assessed primers specificity using BLAST  
435 tools. (Primers are listed in Supplementary data 2).

### 436 **RT-qPCR and PCR**

437 RNA was preserved using Trizol reagents (Life Technology) and RNA extraction was performed as  
438 described (43). cDNA was obtained using Superscript II (Life Technology) retrotranscriptase following the  
439 manufacturer's instructions.

440 qPCR was performed using Power SYBR Green PCR Master Mix (Applied Biosystems) on Rotorgen  
441 (Corbett technology) as described (34). Melting stage was set up as default on the Rotorgen software. PCR  
442 specificity was assessed by the melting temperature ( $T_m$ ). We considered that a sequence is unique for  $T_m$   
443 included in the range  $T_m \pm 0.5^\circ\text{C}$ . Transcript expression was quantified using the Transcript Unit (Tu)  
444 method, as described by Lavsten et al (31). GAPDH and Seryl-tRNA synthetase transcripts were used as  
445 reference genes.

446 For transcripts which displayed a  $T_m$  difference upper than  $0.5^\circ\text{C}$  for a same primer set, we performed a  
447 conventional PCR using AmpliTaqGold DNA polymerase (Applied Biosystem) with the following  
448 conditions: initial denaturation at  $95^\circ\text{C}$  for 10 min, followed by  $52^\circ\text{C}$  hybridization for 30s –  $68^\circ\text{C}$   
449 elongation for 15 s, repeated 35 times. PCR products length was assessed using 2% agarose gel containing  
450 Syber Safe (Life Technology) at 1/10,000.

451 Amplicons were purified using the QIAquick PCR Purification Kit (Qiagen). The purified fragments were  
452 sequenced with BigDye Terminator v3.1 Cycle Sequencing Kit (Applied Biosystems) using g949, g150 (for  
453 patient SA06), and g299 primers (for patient CM04) (Supplementary data 1). The sequence reaction  
454 products were purified using the BigDye XTerminator® Purification Kit (Applied Biosystems), in

455 accordance with the manufacturer's instructions. The purified products were sequenced using an ABI Prism  
456 3100 analyzer (Applied Biosystems), and the sequences were analyzed using DNA Baser v4 (Heracle  
457 BioSoft).

458

## 459 **Acknowledgments**

460 The authors would like to thank patients who participate in the study, the clinicians and nurses who were  
461 involved in patient's inclusion. We especially acknowledge Dr Nadine Fievet help and counselling during  
462 the field study. We would like to thank Matt Berriman, Chris Newbold and Thomas Otto from the Welcome  
463 Trust Sanger Institute for the access to the unpublished PfEMP1 sequences. We also would like to thank  
464 Emilie-Fleur Gautier for her helpful advices in mass spectrometry, and Evangeline Bennana for her  
465 technical support in sample preparation. The authors thank Romain Coppée for his critical comments on the  
466 manuscript, and Antoine Claessens for his help in WGS. We also thank Feder for the opportunity to use  
467 Orbitrap Fusion mass spectrometer.

## 468 **Author's contribution**

469 CK, PD, FG and GB designed the study. CK, SE, JR, JMA and GB conducted the field study. CK, GB, CB,  
470 SG, CP and SH performed the experiments. CK, DR and EG analyzed the data. CK, GB and PD wrote the  
471 paper.

## 472 **Conflict of interest**

473 The authors declare no conflict of interest.

## 474 **Funding**

475 This work was funded by Merieux Research Grant (awarded to Dr Gwladys Bertin for CIVIC project), by  
476 the Laboratoire d'Excellence GR-Ex, Paris, France, reference ANR-11-LABX-0051, that is funded by the  
477 program Investissements d'avenir of the French National Research Agency, reference ANR-11-IDEX-0005-  
478 02 and by NeuroCM project, that is funded by ANR-17-CE17-0001

479 The POPS platform benefits from the support of the LabEx Saclay Plant Sciences-SPS (ANR-10-LABX-  
480 0040-SPS).

481 CK is awarded a PhD Scholarship from French Minister of Research through MTCI Doctoral School (ED  
482 563, Paris Descartes University).

## 483 References

- 484 1. WORLD HEALTH ORGANIZATION. 2018. WORLD MALARIA REPORT 2017. WORLD  
485 HEALTH ORGANIZATION, S.I.
- 486 2. Kessler A, Dankwa S, Bernabeu M, Harawa V, Danziger SA, Duffy F, Kampondeni SD, Potchen MJ,  
487 Dambrauskas N, Vigdorovich V, Oliver BG, Hochman SE, Mowrey WB, MacCormick IJC, Mandala  
488 WL, Rogerson SJ, Sather DN, Aitchison JD, Taylor TE, Seydel KB, Smith JD, Kim K. 2017. Linking  
489 EPCR-Binding PfEMP1 to Brain Swelling in Pediatric Cerebral Malaria. *Cell Host Microbe* 22:601-  
490 614.e5.
- 491 3. Kyes SA, Rowe JA, Kriek N, Newbold CI. 1999. Rifins: a second family of clonally variant proteins  
492 expressed on the surface of red cells infected with *Plasmodium falciparum*. *Proc Natl Acad Sci U S A*  
493 96:9333–9338.
- 494 4. Goel S, Palmkvist M, Moll K, Joannin N, Lara P, Akhouri RR, Moradi N, Öjemalm K, Westman M,  
495 Angeletti D, Kjellin H, Lehtiö J, Blixt O, Idestrom L, Gahmberg CG, Storry JR, Hult AK, Olsson ML,  
496 von Heijne G, Nilsson I, Wahlgren M. 2015. RIFINs are adhesins implicated in severe *Plasmodium*  
497 *falciparum* malaria. *Nat Med* 21:314–317.
- 498 5. Cheng Q, Cloonan N, Fischer K, Thompson J, Waine G, Lanzer M, Saul A. 1998. *stevor* and *rif* are  
499 *Plasmodium falciparum* multicopy gene families which potentially encode variant antigens. *Mol*  
500 *Biochem Parasitol* 97:161–176.
- 501 6. Niang M, Bei AK, Madnani KG, Pelly S, Dankwa S, Kanjee U, Gunalan K, Amaladoss A, Yeo KP,  
502 Bob NS, Malleret B, Duraisingh MT, Preiser PR. 2014. STEVOR is a *Plasmodium falciparum*  
503 erythrocyte binding protein that mediates merozoite invasion and rosetting. *Cell Host Microbe* 16:81–  
504 93.
- 505 7. Leech JH, Barnwell JW, Miller LH, Howard RJ. 1984. Identification of a strain-specific malarial  
506 antigen exposed on the surface of *Plasmodium falciparum*-infected erythrocytes. *J Exp Med* 159:1567–  
507 1575.

- 508 8. Su XZ, Heatwole VM, Wertheimer SP, Guinet F, Herrfeldt JA, Peterson DS, Ravetch JA, Wellems TE.  
509 1995. The large diverse gene family var encodes proteins involved in cytoadherence and antigenic  
510 variation of Plasmodium falciparum-infected erythrocytes. *Cell* 82:89–100.
- 511 9. Baruch DI, Pasloske BL, Singh HB, Bi X, Ma XC, Feldman M, Taraschi TF, Howard RJ. 1995.  
512 Cloning the *P. falciparum* gene encoding PfEMP1, a malarial variant antigen and adherence receptor  
513 on the surface of parasitized human erythrocytes. *Cell* 82:77–87.
- 514 10. Smith JD, Chitnis CE, Craig AG, Roberts DJ, Hudson-Taylor DE, Peterson DS, Pinches R, Newbold  
515 CI, Miller LH. 1995. Switches in expression of Plasmodium falciparum var genes correlate with  
516 changes in antigenic and cytoadherent phenotypes of infected erythrocytes. *Cell* 82:101–110.
- 517 11. Rask TS, Hansen DA, Theander TG, Gorm Pedersen A, Lavstsen T. 2010. Plasmodium falciparum  
518 erythrocyte membrane protein 1 diversity in seven genomes--divide and conquer. *PLoS Comput Biol* 6.
- 519 12. Claessens A, Hamilton WL, Kekre M, Otto TD, Faizullahoy A, Rayner JC, Kwiatkowski D. 2014.  
520 Generation of antigenic diversity in Plasmodium falciparum by structured rearrangement of Var genes  
521 during mitosis. *PLoS Genet* 10:e1004812.
- 522 13. Smith JD. 2014. The role of PfEMP1 adhesion domain classification in Plasmodium falciparum  
523 pathogenesis research. *Mol Biochem Parasitol* 195:82–87.
- 524 14. Wahlgren M, Goel S, Akhouri RR. 2017. Variant surface antigens of Plasmodium falciparum and their  
525 roles in severe malaria. *Nat Rev Microbiol*.
- 526 15. Smith JD, Craig AG, Kriek N, Hudson-Taylor D, Kyes S, Fagan T, Fagen T, Pinches R, Baruch DI,  
527 Newbold CI, Miller LH. 2000. Identification of a Plasmodium falciparum intercellular adhesion  
528 molecule-1 binding domain: a parasite adhesion trait implicated in cerebral malaria. *Proc Natl Acad Sci*  
529 *U S A* 97:1766–1771.

- 530 16. Turner L, Lavstsen T, Berger SS, Wang CW, Petersen JEV, Avril M, Brazier AJ, Freeth J, Jespersen  
531 JS, Nielsen MA, Magistrado P, Lusingu J, Smith JD, Higgins MK, Theander TG. 2013. Severe malaria  
532 is associated with parasite binding to endothelial protein C receptor. *Nature* 498:502–505.
- 533 17. Hess DC, Bhutwala T, Sheppard JC, Zhao W, Smith J. 1994. ICAM-1 expression on human brain  
534 microvascular endothelial cells. *Neurosci Lett* 168:201–204.
- 535 18. Bengtsson A, Joergensen L, Rask TS, Olsen RW, Andersen MA, Turner L, Theander TG, Hviid L,  
536 Higgins MK, Craig A, Brown A, Jensen ATR. 2013. A novel domain cassette identifies *Plasmodium*  
537 *falciparum* PfEMP1 proteins binding ICAM-1 and is a target of cross-reactive, adhesion-inhibitory  
538 antibodies. *J Immunol Baltim Md 1950* 190:240–249.
- 539 19. Madkhali AM, Alkurbi MO, Szeszak T, Bengtsson A, Patil PR, Wu Y, Al-Harhi SA, Alharhi S,  
540 Jensen ATR, Pleass R, Craig AG. 2014. An analysis of the binding characteristics of a panel of  
541 recently selected ICAM-1 binding *Plasmodium falciparum* patient isolates. *PloS One* 9:e111518.
- 542 20. Lennartz F, Adams Y, Bengtsson A, Olsen RW, Turner L, Ndam NT, Ecklu-Mensah G, Moussiliou A,  
543 Ofori MF, Gamain B, Lusingu JP, Petersen JEV, Wang CW, Nunes-Silva S, Jespersen JS, Lau CKY,  
544 Theander TG, Lavstsen T, Hviid L, Higgins MK, Jensen ATR. 2017. Structure-Guided Identification  
545 of a Family of Dual Receptor-Binding PfEMP1 that Is Associated with Cerebral Malaria. *Cell Host*  
546 *Microbe* 21:403–414.
- 547 21. Mkumbaye SI, Wang CW, Lyimo E, Jespersen JS, Manjurano A, Mosha J, Kavishe RA, Mwakalinga  
548 SB, Minja DTR, Lusingu JP, Theander TG, Lavstsen T. 2017. The Severity of *Plasmodium falciparum*  
549 Infection Is Associated with Transcript Levels of var Genes Encoding Endothelial Protein C Receptor-  
550 Binding *P. falciparum* Erythrocyte Membrane Protein 1. *Infect Immun* 85:e00841-16.
- 551 22. Lau CKY, Turner L, Jespersen JS, Lowe ED, Petersen B, Wang CW, Petersen JEV, Lusingu J,  
552 Theander TG, Lavstsen T, Higgins MK. 2015. Structural conservation despite huge sequence diversity  
553 allows EPCR binding by the PfEMP1 family implicated in severe childhood malaria. *Cell Host*  
554 *Microbe* 17:118–129.

- 555 23. Jespersen JS, Wang CW, Mkumbaye SI, Minja DT, Petersen B, Turner L, Petersen JE, Lusingu JP,  
556 Theander TG, Lavstsen T. 2016. Plasmodium falciparum var genes expressed in children with severe  
557 malaria encode CIDR $\alpha$ 1 domains. *EMBO Mol Med* 8:839–850.
- 558 24. Tuikue Ndam N, Moussiliou A, Lavstsen T, Kamaliddin C, Jensen ATR, Mama A, Tahar R, Wang  
559 CW, Jespersen JS, Alao JM, Gamain B, Theander TG, Deloron P. 2017. Parasites Causing Cerebral  
560 Falciparum Malaria Bind Multiple Endothelial Receptors and Express EPCR and ICAM-1-Binding  
561 PfEMP1. *J Infect Dis* 215:1918–1925.
- 562 25. Bull PC, Abdi AI. 2016. The role of PfEMP1 as targets of naturally acquired immunity to childhood  
563 malaria: prospects for a vaccine. *Parasitology* 143:171–186.
- 564 26. Bull PC, Lowe BS, Kortok M, Molyneux CS, Newbold CI, Marsh K. 1998. Parasite antigens on the  
565 infected red cell surface are targets for naturally acquired immunity to malaria. *Nat Med* 4:358–360.
- 566 27. Nielsen MA, Staalsoe T, Kurtzhals JAL, Goka BQ, Dodoo D, Alifrangis M, Theander TG, Akanmori  
567 BD, Hviid L. 2002. Plasmodium falciparum variant surface antigen expression varies between isolates  
568 causing severe and nonsevere malaria and is modified by acquired immunity. *J Immunol Baltim Md*  
569 1950 168:3444–3450.
- 570 28. Barry AE, Leliwa-Sytek A, Tavul L, Imrie H, Migot-Nabias F, Brown SM, McVean GAV, Day KP.  
571 2007. Population genomics of the immune evasion (var) genes of Plasmodium falciparum. *PLoS*  
572 *Pathog* 3:e34.
- 573 29. Nielsen MA, Vestergaard LS, Lusingu J, Kurtzhals JAL, Giha HA, Grevstad B, Goka BQ, Lemnge  
574 MM, Jensen JB, Akanmori BD, Theander TG, Staalsoe T, Hviid L. 2004. Geographical and temporal  
575 conservation of antibody recognition of Plasmodium falciparum variant surface antigens. *Infect Immun*  
576 72:3531–3535.
- 577 30. Hviid L, Lavstsen T, Jensen AT. 2018. A vaccine targeted specifically to prevent cerebral malaria - is  
578 there hope? *Expert Rev Vaccines*.



- 579 31. Lavstsen T, Turner L, Saguti F, Magistrado P, Rask TS, Jespersen JS, Wang CW, Berger SS, Baraka  
580 V, Marquard AM, Seguin-Orlando A, Willerslev E, Gilbert MTP, Lusingu J, Theander TG. 2012.  
581 Plasmodium falciparum erythrocyte membrane protein 1 domain cassettes 8 and 13 are associated with  
582 severe malaria in children. *Proc Natl Acad Sci U S A* 109:E1791-1800.
- 583 32. Argy N, Bertin GI, Milet J, Hubert V, Clain J, Cojean S, Houzé P, Tuikue-Ndam N, Kendjo E, Deloron  
584 P, Houzé S, CNRP Study Group. 2017. Preferential expression of domain cassettes 4, 8 and 13 of  
585 Plasmodium falciparum erythrocyte membrane protein 1 in severe malaria imported in France. *Clin  
586 Microbiol Infect Off Publ Eur Soc Clin Microbiol Infect Dis* 23:211.e1-211.e4.
- 587 33. Bertin GI, Sabbagh A, Guillonneau F, Jafari-Guemouri S, Ezinmegnon S, Federici C, Hounkpatin B,  
588 Fievet N, Deloron P. 2013. Differential protein expression profiles between Plasmodium falciparum  
589 parasites isolated from subjects presenting with pregnancy-associated malaria and uncomplicated  
590 malaria in Benin. *J Infect Dis* 208:1987–1997.
- 591 34. Bertin GI, Lavstsen T, Guillonneau F, Doritchamou J, Wang CW, Jespersen JS, Ezimegnon S, Fievet  
592 N, Alao MJ, Lalya F, Massougbdji A, Ndam NT, Theander TG, Deloron P. 2013. Expression of the  
593 domain cassette 8 Plasmodium falciparum erythrocyte membrane protein 1 is associated with cerebral  
594 malaria in Benin. *PloS One* 8:e68368.
- 595 35. Hsieh F-L, Turner L, Bolla JR, Robinson CV, Lavstsen T, Higgins MK. 2016. The structural basis for  
596 CD36 binding by the malaria parasite. *Nat Commun* 7:12837.
- 597 36. Miller LH, Baruch DI, Marsh K, Doumbo OK. 2002. The pathogenic basis of malaria. *Nature*  
598 415:673–679.
- 599 37. Smith JD, Rowe JA, Higgins MK, Lavstsen T. 2013. Malaria's deadly grip: cytoadhesion of  
600 Plasmodium falciparum-infected erythrocytes. *Cell Microbiol* 15:1976–1983.
- 601 38. Bertin GI, Sabbagh A, Argy N, Salnot V, Ezinmegnon S, Agbota G, Ladipo Y, Alao JM, Sagbo G,  
602 Guillonneau F, Deloron P. 2016. Proteomic analysis of Plasmodium falciparum parasites from patients  
603 with cerebral and uncomplicated malaria. *Sci Rep* 6:26773.

- 604 39. Jafari S, Le Bras J, Bouchaud O, Durand R. 2004. Plasmodium falciparum clonal population dynamics  
605 during malaria treatment. *J Infect Dis* 189:195–203.
- 606 40. Avril M, Bernabeu M, Benjamin M, Brazier AJ, Smith JD. 2016. Interaction between Endothelial  
607 Protein C Receptor and Intercellular Adhesion Molecule 1 to Mediate Binding of Plasmodium  
608 falciparum-Infected Erythrocytes to Endothelial Cells. *mBio* 7:e00615-16.
- 609 41. Cham GKK, Turner L, Kurtis JD, Mutabingwa T, Fried M, Jensen ATR, Lavstsen T, Hviid L, Duffy  
610 PE, Theander TG. 2010. Hierarchical, domain type-specific acquisition of antibodies to Plasmodium  
611 falciparum erythrocyte membrane protein 1 in Tanzanian children. *Infect Immun* 78:4653–4659.
- 612 42. Tessema SK, Utama D, Chesnokov O, Hodder AN, Lin CS, Harrison GLA, Jespersen JS, Petersen B,  
613 Tavul L, Siba P, Kwiatkowski D, Lavstsen T, Hansen DS, Oleinikov AV, Mueller I, Barry AE. 2018.  
614 Antibodies to Intercellular Adhesion Molecule 1-Binding Plasmodium falciparum Erythrocyte  
615 Membrane Protein 1-DBL $\beta$  Are Biomarkers of Protective Immunity to Malaria in a Cohort of Young  
616 Children from Papua New Guinea. *Infect Immun* 86.
- 617 43. Ponts N, Chung D-WD, Le Roch KG. 2012. Strand-specific RNA-seq applied to malaria samples.  
618 *Methods Mol Biol Clifton NJ* 883:59–73.
- 619 44. Schroeder A, Mueller O, Stocker S, Salowsky R, Leiber M, Gassmann M, Lightfoot S, Menzel W,  
620 Granzow M, Ragg T. 2006. The RIN: an RNA integrity number for assigning integrity values to RNA  
621 measurements. *BMC Mol Biol* 7:3.
- 622 45. Bolger AM, Lohse M, Usadel B. 2014. Trimmomatic: a flexible trimmer for Illumina sequence data.  
623 *Bioinforma Oxf Engl* 30:2114–2120.
- 624 46. Kopylova E, Noé L, Touzet H. 2012. SortMeRNA: fast and accurate filtering of ribosomal RNAs in  
625 metatranscriptomic data. *Bioinforma Oxf Engl* 28:3211–3217.
- 626 47. Kulak NA, Pichler G, Paron I, Nagaraj N, Mann M. 2014. Minimal, encapsulated proteomic-sample  
627 processing applied to copy-number estimation in eukaryotic cells. *Nat Methods* 11:319–324.

- 628 48. Gautier E-F, Ducamp S, Leduc M, Salnot V, Guillonneau F, Dussiot M, Hale J, Giarratana M-C,  
629 Raimbault A, Douay L, Lacombe C, Mohandas N, Verdier F, Zermati Y, Mayeux P. 2016.  
630 Comprehensive Proteomic Analysis of Human Erythropoiesis. *Cell Rep* 16:1470–1484.
- 631 49. Cox J, Hein MY, Luber CA, Paron I, Nagaraj N, Mann M. 2014. Accurate proteome-wide label-free  
632 quantification by delayed normalization and maximal peptide ratio extraction, termed MaxLFQ. *Mol*  
633 *Cell Proteomics MCP* 13:2513–2526.
- 634 50. Sigrist CJA, Cerutti L, Hulo N, Gattiker A, Falquet L, Pagni M, Bairoch A, Bucher P. 2002. PROSITE:  
635 a documented database using patterns and profiles as motif descriptors. *Brief Bioinform* 3:265–274.
- 636 51. Sali A, Blundell TL. 1993. Comparative protein modelling by satisfaction of spatial restraints. *J Mol*  
637 *Biol* 234:779–815.
- 638 52. Berman HM, Westbrook J, Feng Z, Gilliland G, Bhat TN, Weissig H, Shindyalov IN, Bourne PE.  
639 2000. The Protein Data Bank. *Nucleic Acids Res* 28:235–242.
- 640 53. Grant BJ, Rodrigues APC, ElSawy KM, McCammon JA, Caves LSD. 2006. Bio3d: an R package for  
641 the comparative analysis of protein structures. *Bioinforma Oxf Engl* 22:2695–2696.
- 642 54. Corpet F. 1988. Multiple sequence alignment with hierarchical clustering. *Nucleic Acids Res*  
643 16:10881–10890.
- 644 55. Untergasser A, Nijveen H, Rao X, Bisseling T, Geurts R, Leunissen JAM. 2007. Primer3Plus, an  
645 enhanced web interface to Primer3. *Nucleic Acids Res* 35:W71–W74.

## 646 **Figure's legends**

### 647 **Figure 1: Proteogenomic approach on field samples for PfEMP1 identification.**

648 Whole blood sample from patients are collected. DNA and RNA are extracted from parasite's ring forms.  
649 From the same collected tube, parasites are matured and the corresponding proteins from mature form  
650 (within one maturation cycle) are extracted and analyzed in LC-MS/MS. Whole genome sequencing data  
651 enrich the protein database used for protein identification with LC-MS/MS data. Selective mRNA

652 sequencing provides additional information's to elucidate proteins identification within the home-made  
653 database.

## 654 **Figure 2: Schematic representation of domain attribution to PfEMP1 sequences and peptides**

655 The PfEMP1 « x » has been identified in mass spectrometry with the peptides « A », « B », « C », « D », and  
656 « E ». The general domains organisation of PfEMP1 « x » can be attributed using the VarDom online  
657 servers.

658 However, subdomains attribution is not over possible with confident score. Local blast of the peptides used  
659 for protein identification retrieves different types of results. First option (peptides « A », and « E ») is that  
660 the peptide local blast allows for a « general » domain attribution, without subtype. Second option (peptide  
661 « C ») is that the peptide is known within the precise sequence of a subdomain and allows identification of a  
662 subdomain. Unattributed peptides within the reference sequences has two origins. 1/The peptide is shared  
663 between two domains and the amino acids belonging to each domain are not sufficient for confident  
664 attribution. 2/The peptide is « unknown » in the reference sequence repository (a new PfEMP1 related  
665 peptide has been implemented).

666

## 667 **Figure 3: Domain description of the identified PfEMP1**

668 PfEMP1 domain assignment for the one identified through mass spectrometry experiment. Proteins  
669 sequences have been mapped on VarDom server for domain attribution. Each color correspond to a domain  
670 type, corresponding to the VarDom server color code. DBL $\beta$  containing the binding pattern to ICAM-1 are  
671 highlighted with bold red rectangle.

## 672 **Figure 4: PfEMP1 domain count in the corresponding samples**

673 Number of each domain attribute to the PfEMP1 peptides identified in CM, SA and UM samples. Color  
674 code is proportional to the number of identified domains (blue: low number and red: high number). NTS  
675 associated peptide is found once in each sample, except for 1 CM isolate and 4 SA isolates. CIDR $\alpha$   
676 matching peptides have been observed in 2/4 CM, 5/9 SA and 2/9 UM. DBL $\delta$  matching domains have been

677 found in 3/4 CM, 9/9 SA and 9/9 UM. In all samples, peptides corresponding to the protein sequence did  
678 not match with a known domain.

679 **Figure 5: Venne Diagram representation of PfEMP1 identification**

680 Representation of sequence identified in accordance with clinical presentation. 18 sequences were associated  
681 with SA only, 2 with CM and 5 with UM. SA and CM shared 8 sequences, CM and UM 14 sequences, and  
682 SA and UM 6 sequences. All three groups shared 11 sequences as well. CIDR $\alpha$  domain is found in 1/2 CM  
683 specific sequence; 13/18 SA sequences; 3/8 sequences shared between CM and SA and 3/5 UM sequences.  
684 Concerning DBL $\beta$ , the domain is contained in 1/2 CM sequences, 11/18 SA sequences, 4/8 sequences shared  
685 between CM and SA, and 4/5 UM sequences

686 **Figure 6: 3D representation of the CIDR $\alpha$  associated to DBL $\beta$  containing ICAM-1 binding pattern**

687 A) PCA representation of DBL $\beta$  RMSD values obtained after structure modelling. B) PCA representation of  
688 CIDR $\alpha$  RMSD values obtained after structure modelling. Green circle highlight sequences presenting  
689 CIDR $\alpha$  binding EPCR C) Juxtaposition of the structure predicted from the 6 CIDR $\alpha$  associated to DBL $\beta$   
690 containing ICAM-1 binding pattern. Amino acid known for binding to EPCR is highlighted in blue. The two  
691 front  $\alpha$  helix are folded accordingly to the structure from Hb3var3 and ITvar7, which bind EPCR. Structure  
692 have been drawn using Pymol.

693 **Figure 7 : Transcript proportion for sample SA06, identified by selective RT-qPCR**

694 Expression of *var* transcript within sample SA06 at diagnosis and 16h post treatment initiation. The relative  
695 percentage of each transcript is presented. Each transcript expression has been evaluated using dedicated  
696 primers specific to the newly identified *var* sequences.

697 Using two reference genes for quantification, we identified the transcript g45 as the major expressed  
698 transcript for SA06 (at H16) samples, followed by transcript g949, g1030, g1025, g150, g62 (Tu  
699 respectively 3114.96 – 75.85 – 18.19 – 17.81 – 13.98 – 1.90). In the H0 sample, the following transcript  
700 were identified g1025, g1030, g45, g150, g949, g62 (Tu respectively: 23.59 – 6.77 – 2.64 – 2.41- 2.25 –  
701 1.66)

702 **Table 1**

703 PfEMP1 sequences identified within each clinical group

704 **Supplemental material legends**

705 **Supplemental material 1**

706 Control transcript evaluation for RNAsequencing

707 **Supplemental material 2**

708 Primers used for selective PfEMP1 sequencing

709 **Supplemental material 3**

710 Identification of PfEMP1

711 **Supplemental material 4**

712 Selective sequencing of *var* genes within field samples

713 **Supplemental material 5**

714 ENA accession numbers from genomic datafiles

715

716

717

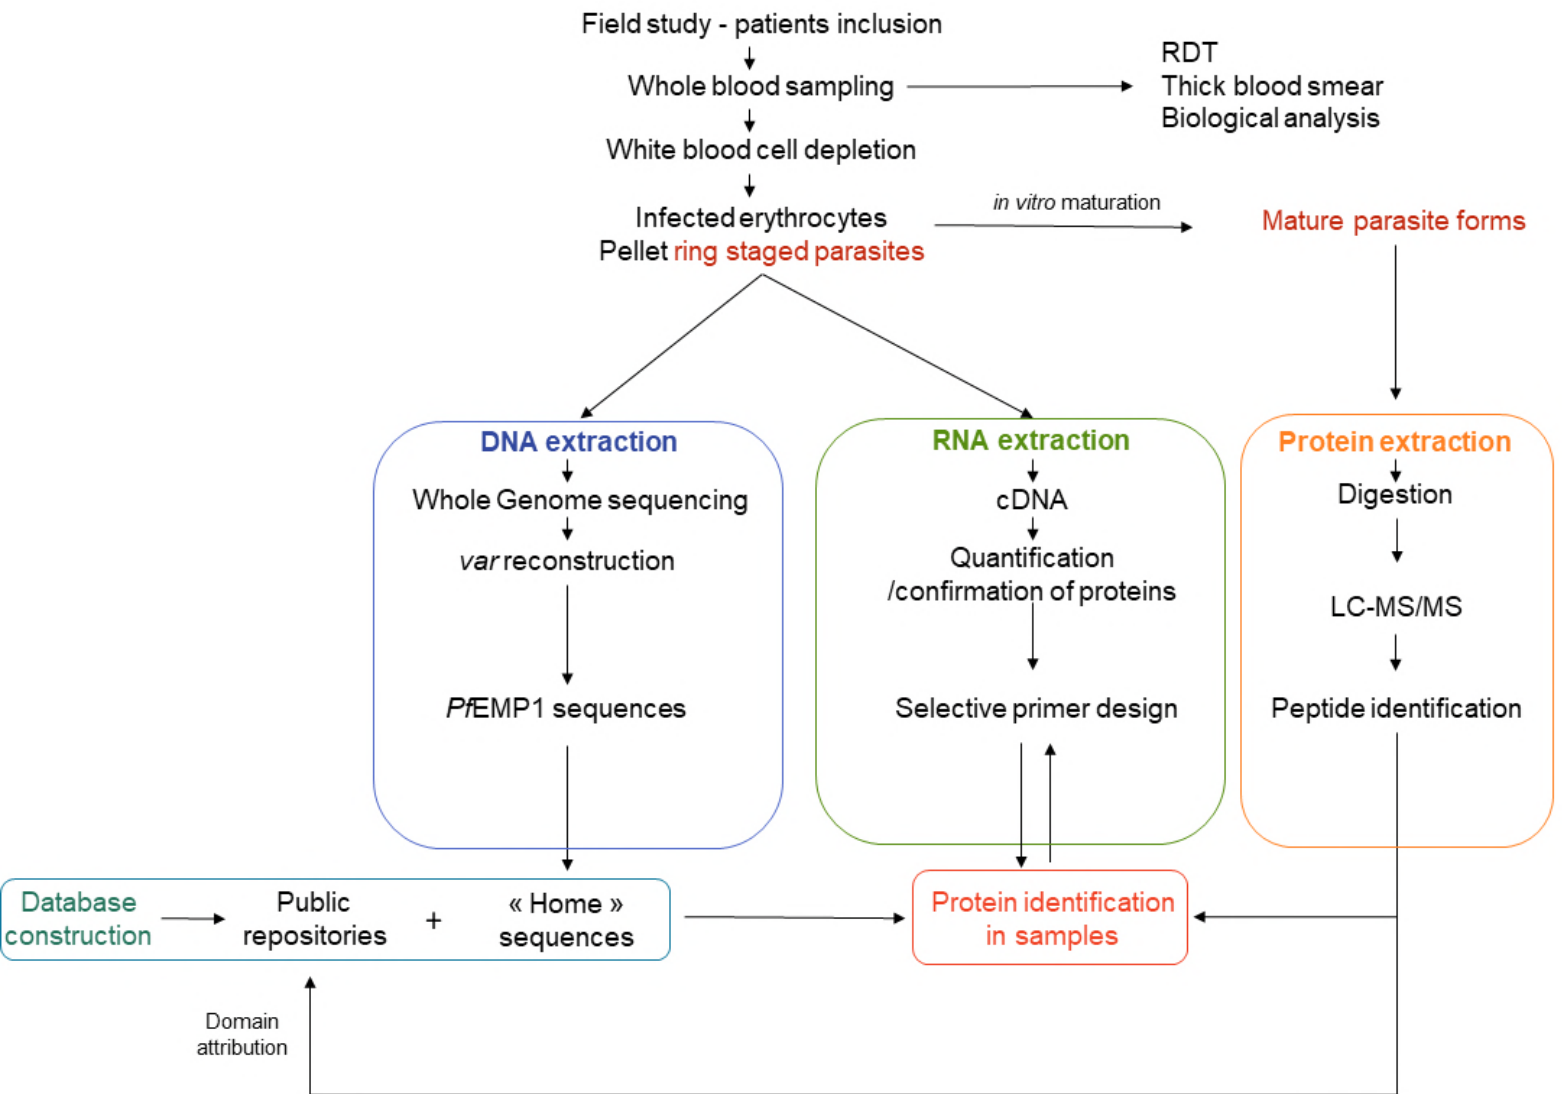

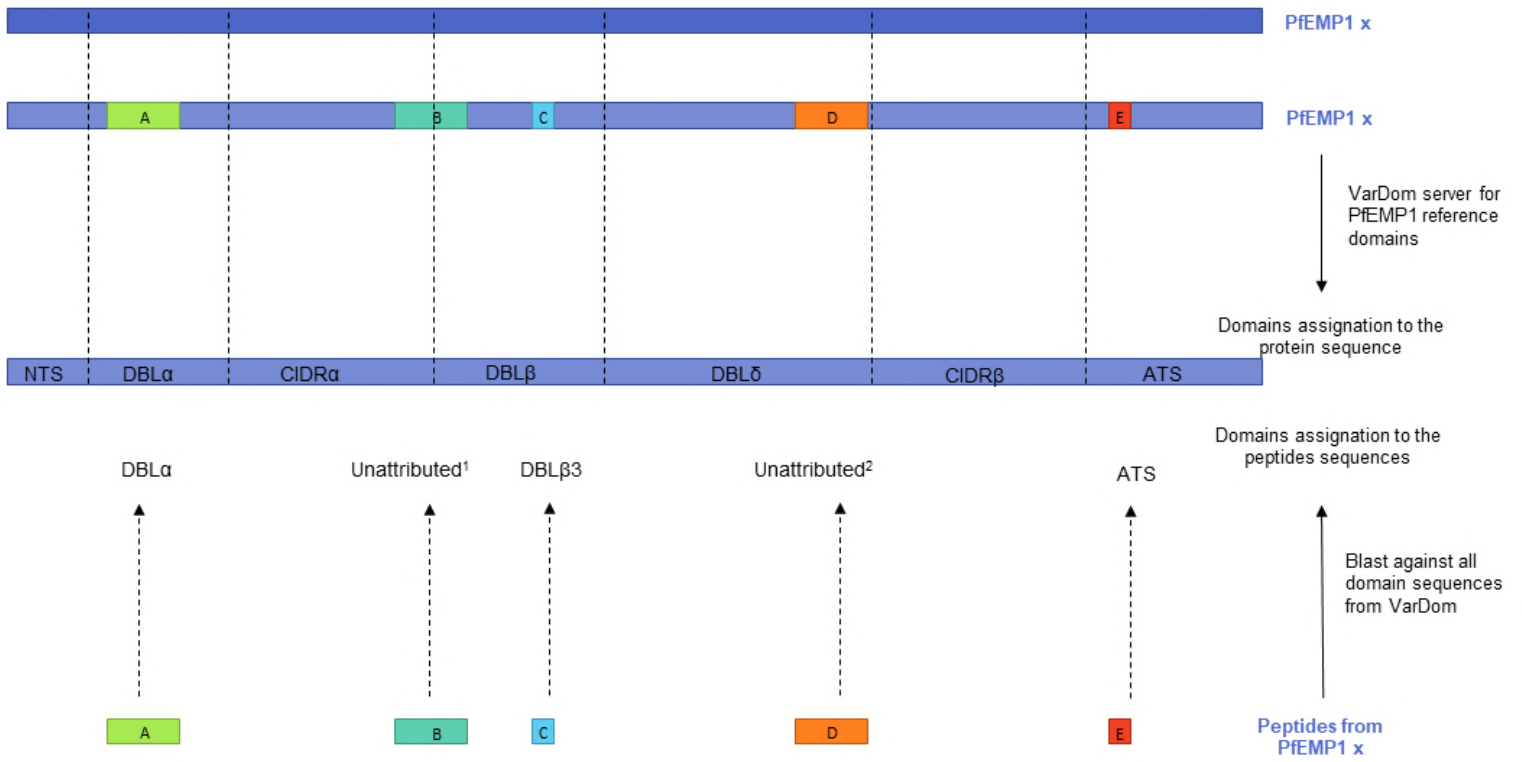





|       | CM01 | CM02 | CM03 | CM04 | SA01 | SA02 | SA03 | SA04 | SA05 | SA06 | SA07 | SA08 | SA09 | UM01 | UM02 | UM03 | UM04 | UM05 | UM06 | UM07 | UM08 | UM09 |   |
|-------|------|------|------|------|------|------|------|------|------|------|------|------|------|------|------|------|------|------|------|------|------|------|---|
| ATS   |      |      |      | 2    |      | 1    | 2    | 1    |      | 3    |      | 2    |      |      | 1    | 3    |      |      |      |      |      |      |   |
| CIDRa |      | 2    |      | 3    |      | 1    | 2    | 1    |      | 2    |      | 1    |      |      | 1    |      |      |      | 1    |      |      |      |   |
| CIDRb |      | 1    | 1    | 5    | 1    | 2    |      | 1    | 1    | 5    |      | 2    | 1    | 1    |      |      | 2    |      |      |      |      |      | 1 |
| DBLa  |      |      |      |      |      |      | 1    | 2    |      | 3    | 1    | 3    |      | 1    |      | 1    | 1    | 1    |      | 1    |      | 2    |   |
| DBLb  |      |      |      | 4    |      |      | 1    |      |      | 8    |      | 1    |      |      |      | 1    |      |      | 1    |      |      |      |   |
| DBLd  |      | 2    | 2    | 5    | 1    | 2    | 5    | 3    | 2    | 12   | 1    | 4    | 2    | 1    | 4    | 4    | 2    | 1    | 1    | 1    | 5    | 2    |   |
| DBLe  |      |      | 1    | 1    |      |      | 1    | 1    |      | 2    | 2    |      | 1    |      |      |      | 1    |      | 1    | 1    | 1    | 1    |   |
| DBLg  |      |      |      |      |      |      |      | 2    | 1    | 4    | 1    | 2    |      |      |      |      | 1    |      |      | 2    |      |      |   |
| DBLz  |      |      |      | 1    |      |      | 1    |      |      |      |      |      |      |      | 1    | 1    |      |      |      |      |      | 1    |   |
| NTS   | 1    | 1    | 2    | 1    | 1    | 1    | 2    | 1    | 1    | 3    | 1    | 2    | 2    | 1    | 1    | 1    | 1    | 1    | 1    | 1    | 1    | 1    | 1 |
| na    | 1    | 1    | 1    | 7    | 2    | 1    | 5    | 5    | 4    | 6    |      | 6    |      | 1    |      | 1    |      |      | 2    | 1    | 2    | 3    |   |

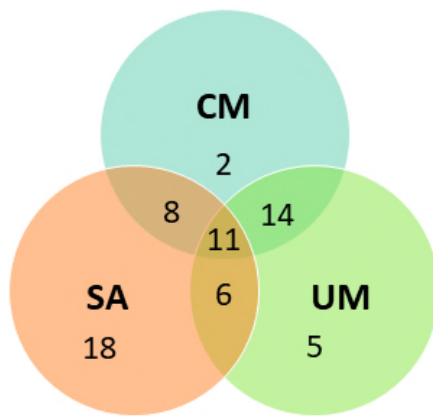

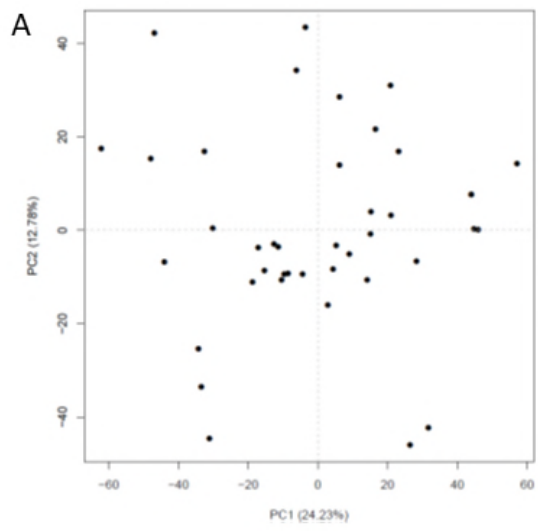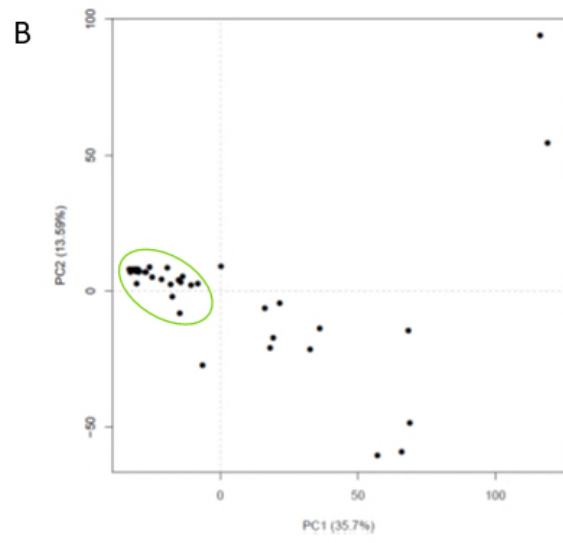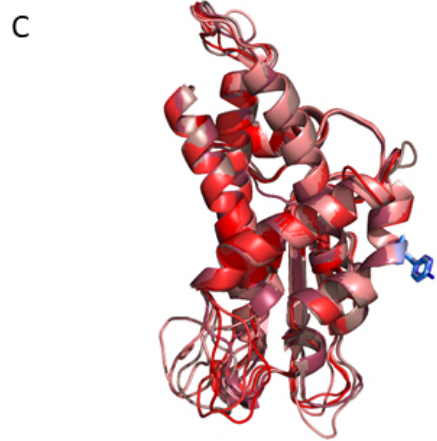

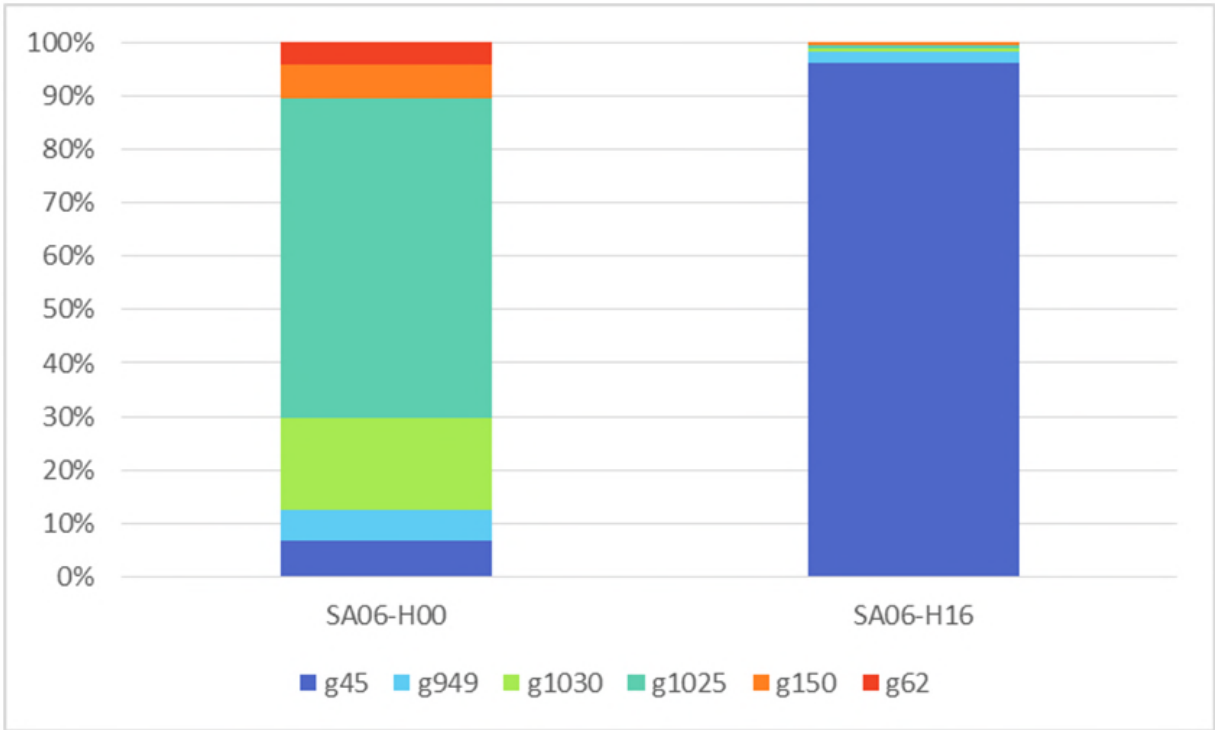

| Sequence ID      | Origin   | Phenotype | Domains combination |                   |                   |                |                 |                  |                |              |                |             |              |                |              |      |                |     |
|------------------|----------|-----------|---------------------|-------------------|-------------------|----------------|-----------------|------------------|----------------|--------------|----------------|-------------|--------------|----------------|--------------|------|----------------|-----|
| UM               |          |           |                     |                   |                   |                |                 |                  |                |              |                |             |              |                |              |      |                |     |
| 049H_H24-C.g515  | Field    | na        | NTS                 | DBL $\alpha$      | CIDR $\alpha$     | DBL $\beta$    | DBL $\beta$     | DBL $\gamma$     | DBL $\gamma$   | DBL $\delta$ | CIDR $\beta$   |             |              |                |              |      |                |     |
| QT0036-CW.g1117  | Field    | na        | NTS                 | DBL $\alpha$      | CIDR $\alpha$     | DBL $\beta$    | DBL $\beta$     | DBL $\gamma$     | DBL $\delta$   | CIDR $\beta$ |                |             |              |                |              |      |                |     |
| 024H_H08-C.g133  | Field    | na        | NTS                 | DBL $\alpha$      | CIDR $\alpha$     | DBL $\delta$   | CIDR $\beta$    | DBLz             | DBL $\epsilon$ |              |                |             |              |                |              |      |                |     |
| 044H_H24-C.g315  | Field    | na        | ATS                 |                   |                   |                |                 |                  |                |              |                |             |              |                |              |      |                |     |
| 065H_H16-C.g1122 | Field    | na        | NTS                 | DBL $\alpha$      | CIDR $\alpha$     | DBL $\beta$    | DBL $\delta$    | CIDR $\gamma$    | DBL $\gamma$   | DBLz         | ATS            |             |              |                |              |      |                |     |
| CM               |          |           |                     |                   |                   |                |                 |                  |                |              |                |             |              |                |              |      |                |     |
| 074H_H08-C.g299  | Field    | na        | CIDR $\beta$        |                   |                   |                |                 |                  |                |              |                |             |              |                |              |      |                |     |
| PF07_0050        | PlasmoDB | na        | NTS                 | DBL $\alpha$ 0.18 | CIDR $\alpha$ 6   | DBL $\beta$ 6  | DBL $\gamma$ 9  | ATS              |                |              |                |             |              |                |              |      |                |     |
| SA               |          |           |                     |                   |                   |                |                 |                  |                |              |                |             |              |                |              |      |                |     |
| QT0009-CW4.g3425 | Field    | na        | NTS                 | DBL $\alpha$      | CIDR $\alpha$     | DBL $\delta$   | CIDR $\beta$    |                  |                |              |                |             |              |                |              |      |                |     |
| 574984302        | NCBI     | na        | NTS                 | DBL $\alpha$      | CIDR $\alpha$     | DBL $\beta$    | DBL $\delta$    | CIDR $\gamma$    |                |              |                |             |              |                |              |      |                |     |
| 069H_H00-C.g949  | Field    | na        |                     | DBL $\beta$       | DBL $\beta$       | DBL $\delta$   |                 |                  |                |              |                |             |              |                |              |      |                |     |
| 069H_H00-C.g150  | Field    | na        |                     | CIDR $\alpha$     | DBL $\beta$ 3     | DBL $\gamma$   | DBL $\delta$    | CIDR $\gamma$    |                |              |                |             |              |                |              |      |                |     |
| 061H_H16-C.g486  | Field    | na        | NTS                 | DBL $\alpha$      | CIDR $\alpha$     | DBL $\beta$    | DBL $\gamma$    | DBL $\delta$     | CIDR $\gamma$  |              |                |             |              |                |              |      |                |     |
| QT0017-C.g13     | Field    | na        | NTS                 | DBL $\alpha$      | CIDR $\alpha$     | DBL $\beta$    | DBL $\gamma$    | DBLz             | DBL $\epsilon$ |              |                |             |              |                |              |      |                |     |
| 572SJ-C.g456     | Field    | na        | NTS                 | DBL $\alpha$      | CIDR $\alpha$     | DBL $\beta$    | DBL $\gamma$    | DBL $\gamma$     | DBL $\delta$   | CIDR $\beta$ |                |             |              |                |              |      |                |     |
| IT4var15         | VarDom   | CD36      | NTS                 | DBL $\alpha$ 0.8  | CIDR $\alpha$ 3.5 | DBL $\beta$ 3  | DBL $\delta$ 1  | CIDR $\beta$ 1   | ATS            |              |                |             |              |                |              |      |                |     |
| 069H_H00-C.g45   | Field    | na        |                     | DBL $\gamma$      | DBL $\delta$      | CIDR $\beta$   |                 |                  |                |              |                |             |              |                |              |      |                |     |
| 025H_H24-C.g225  | Field    | na        | ATS                 |                   |                   |                |                 |                  |                |              |                |             |              |                |              |      |                |     |
| QT0001-C.g391    | Field    | na        | NTS                 | DBL $\alpha$      | CIDR $\alpha$     | DBL $\beta$    | DBL $\delta$    | CIDR $\gamma$    | DBL $\epsilon$ | DBLz         | DBL $\epsilon$ | DBL $\beta$ | DBL $\delta$ | DBL $\epsilon$ | DBL $\gamma$ | DBLz | DBL $\epsilon$ | ATS |
| 069H_H00-C.g1030 | Field    | na        | NTS                 | DBL $\alpha$      | CIDR $\alpha$     | DBL $\beta$    | DBL $\gamma$    | DBL $\delta$     | CIDR $\beta$   | DBL $\beta$  | DBL $\gamma$   |             |              |                |              |      |                |     |
| QT0032-CM.g2637  | Field    | na        | NTS                 | DBL $\alpha$      | CIDR $\alpha$     | DBL $\beta$    | DBL $\delta$    | CIDR $\gamma$    |                |              |                |             |              |                |              |      |                |     |
| 574984185        | NCBI     | na        | NTS                 | DBL $\alpha$      | CIDR $\alpha$     | DBL $\beta$    | DBL $\gamma$    | DBLz             | DBL $\epsilon$ | ATS          |                |             |              |                |              |      |                |     |
| 610SJ-C.g1       | Field    | na        | ATS                 |                   |                   |                |                 |                  |                |              |                |             |              |                |              |      |                |     |
| DD2var29         | VarDom   | CD36      | NTS                 | DBL $\alpha$ 0.16 | CIDR $\alpha$ 3.4 | DBL $\delta$ 1 | CIDR $\beta$ 1  | DBL $\gamma$ 10  | ATS            |              |                |             |              |                |              |      |                |     |
| 073H_H08-C.g576  | Field    | na        | NTS                 | DBL $\alpha$      | CIDR $\alpha$     | DBL $\gamma$   | DBL $\delta$    | CIDR $\beta$     | DBL $\epsilon$ | DBLz         | ATS            |             |              |                |              |      |                |     |
| PFCLINvar21      | VarDom   |           | DBL $\delta$ 1      | CIDR $\beta$ 1    | ATS               |                |                 |                  |                |              |                |             |              |                |              |      |                |     |
| CM + SA          |          |           |                     |                   |                   |                |                 |                  |                |              |                |             |              |                |              |      |                |     |
| 069H_H08-C.g1025 | Field    | na        | DBL $\alpha$        | CIDR $\gamma$     | DBL $\beta$       | DBL $\gamma$   | DBL $\gamma$    | DBL $\gamma$     | DBL $\gamma$   |              |                |             |              |                |              |      |                |     |
| DD2var28         | VarDom   | ?         | NTS                 | DBL $\alpha$ 0.4  | CIDR $\alpha$ 6   | DBL $\beta$ 5  | DBL $\gamma$ 18 | DBL $\epsilon$ 8 | ATS            |              |                |             |              |                |              |      |                |     |
| 029H_H00-C.g187  | Field    | na        | NTS                 | DBL $\alpha$      | CIDR $\alpha$     | DBL $\delta$   | CIDR $\beta$    |                  |                |              |                |             |              |                |              |      |                |     |
| 712SJ-C.g117     | Field    | na        | NTS                 | DBL $\alpha$      | CIDR $\alpha$     | DBL $\beta$    | DBL $\gamma$    | DBLz             |                |              |                |             |              |                |              |      |                |     |
| 579318932        | NCBI     | na        | NTS                 | DBL $\alpha$      | CIDR $\alpha$     | DBL $\delta$   | CIDR $\beta$    | ATS              |                |              |                |             |              |                |              |      |                |     |
| QT0033-CW3.g12   | Field    | na        | DBL $\beta$         | DBL $\beta$       | DBL $\delta$      | CIDR $\gamma$  |                 |                  |                |              |                |             |              |                |              |      |                |     |

|                 |       |    |     |              |               |             |             |              |              |              |
|-----------------|-------|----|-----|--------------|---------------|-------------|-------------|--------------|--------------|--------------|
| 069H_H00-C.g62  | Field | na | NTS | DBL $\alpha$ | CIDR $\alpha$ |             |             |              |              |              |
| 021H_H00-C.g675 | Field | na | NTS | DBL $\alpha$ | CIDR $\delta$ | DBL $\beta$ | DBL $\beta$ | DBL $\gamma$ | DBL $\delta$ | CIDR $\beta$ |

Legend

ICAM 1  
binding +  
reference  
sequence

Table 1 : Sequences identification and origin from the PfEMP1 sequences identified using mass spectrometry in field isolates from Benin.
